# Supplementary material
Source: Springer Nature journal article supplement (https://www.springermedizin.de/resource/supplementary/12931_2013_1385_MOESM2_ESM.pdf/9426136)

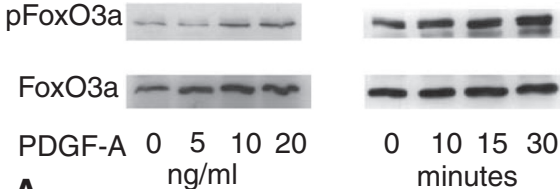

**A**

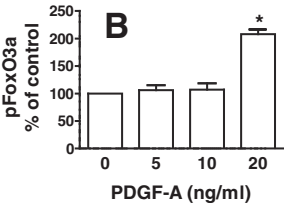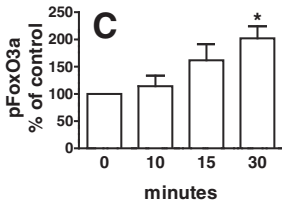

Supplement: MOESM2 [file 9426136]
